# Supplementary material for: Hydrothermally stable molecular separation membranes from organically linked silica
Source: Royal Society of Chemistry journal article supplement (doi:10.1039/b801972j), 2008-01-01
Supplement: b801972j.pdf [file b801972j.pdf]

Electronic supplementary information for:

## Hydrothermally stable molecular separation membranes from organically linked silica

Hessel L. Castricum,\* Ashima Sah, Robert Kreiter, Dave H.A. Blank, Jaap F. Vente and Johan E. ten Elshof

*Inorganic Materials Science, MESA+ Institute for Nanotechnology, University of Twente, Postbus 217, 7500 AE, Enschede, The Netherlands. Fax: (+31) 53 4894683; Tel: (+31) 53 4892695; E-mail: castric@science.uva.nl*

*Van 't Hoff Institute for Molecular Sciences, University of Amsterdam, Nieuwe Achtergracht 166, 1018 WV Amsterdam, The Netherlands.*

*Energy Research Centre of the Netherlands, Postbus 1, 1755 ZG Petten, The Netherlands.*

Small Angle X-ray Scattering patterns of sols I, II and III are displayed in figure S1. Log-log fits were made of similar parts of the pattern to obtain the fractal dimension. For a well-developed sol (III), the fractal dimension of the colloids persists towards smaller  $q$ . This indicates that the fractal structure can be observed over a somewhat larger range, which corresponds well with the bigger size of the sol colloids.

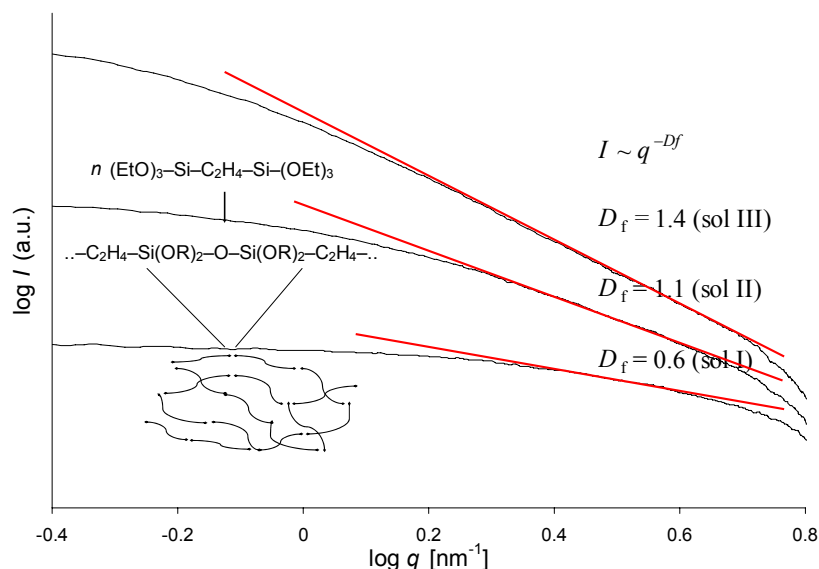

**Figure S1.** Small Angle X-ray Scattering patterns of sols I, II and III and illustration of the sol structure. The patterns have been fitted with an exponential relation to obtain the fractal dimension.

The absence of a structure with pores larger than the diameter of nitrogen can be observed from the adsorption isotherm. Figure S2 shows the N<sub>2</sub> adsorption isotherm of a thermally consolidated unsupported film prepared from sol II. As the blank measurement of only the measurement tube exhibits a similar  $p/V$  relation as the measurement tube including the sample, net adsorption by the sample is negligible. Within the experimental error, the surface area from this isotherm equals zero.

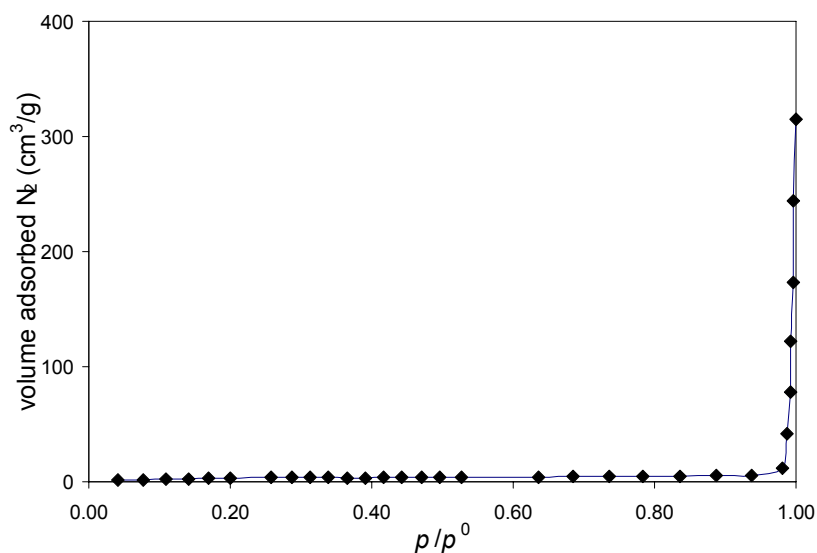

**Figure S2.** Nitrogen adsorption isotherm determined at 77 K for a thermally consolidated unsupported film prepared from sol II. The N<sub>2</sub> volume (at standard  $T/p$ ) is plotted against the relative N<sub>2</sub> pressure at 77 K.
